# Supplementary material
Source: PubMed Central journal article supplement (PMC4670762)
Supplement: CJN.03000315_CJN03000315SupplementaryData.pdf [file CJN.03000315_CJN03000315SupplementaryData.pdf]

**Supplementary document**

**Table S1.** Alleles used for making the genetic risk score <sup>1,2</sup>

| <b>SNP</b>                 | <b>Closest gene</b>  | <b>Coded allele frequency</b> | <b>Coded allele</b> | <b>Beta</b> |
|----------------------------|----------------------|-------------------------------|---------------------|-------------|
| <b>Pulse Pressure</b>      |                      |                               |                     |             |
| rs13002573                 | <i>FIGN</i>          | 0.203                         | G                   | -0.31       |
| rs871606                   | <i>CHIC2</i>         | 0.850                         | T                   | 0.429       |
| rs17477177                 | <i>PIK3CG</i>        | 0.717                         | T                   | -0.418      |
| rs2071518                  | <i>NOV</i>           | 0.167                         | T                   | 0.312       |
| rs11222084                 | <i>ADAMTS-8</i>      | 0.375                         | T                   | 0.337       |
| rs1173756                  | <i>NPR3</i>          | 0.525                         | T                   | -0.267      |
| rs9663362                  | <i>PLCE-1</i>        | 0.533                         | G                   | -0.271      |
| rs3824755                  | <i>CYP17A1-NT5C3</i> | 0.933                         | G                   | 0.477       |
| rs17249754                 | <i>ATP2B1</i>        | 0.892                         | G                   | 0.392       |
| rs17608766                 | <i>GOSR2</i>         | 0.908                         | T                   | -0.534      |
| <b>Pulse Wave Velocity</b> |                      |                               |                     |             |
| rs1381289                  | <i>C14orf64</i>      | 0.436                         | T                   | -0.073      |
| rs10764094                 | <i>C10orf112</i>     | 0.471                         | C                   | 0.057       |
| rs4778983                  | <i>EFTUD1</i>        | 0.301                         | C                   | 0.057       |
| rs6485690                  | <i>CKAP5</i>         | 0.308                         | A                   | -0.056      |
| rs7959220                  | <i>ELK3</i>          | 0.027                         | G                   | 0.266       |
| rs6472483                  | <i>SLCO5A1</i>       | 0.452                         | T                   | -0.05       |
| rs6101837                  | <i>MAFB</i>          | 0.416                         | C                   | -0.05       |
| rs6947805                  | <i>CADPS2</i>        | 0.050                         | T                   | 0.117       |
| rs3742207                  | <i>COL4A1</i>        | 0.361                         | G                   | -0.025      |

**Table S2.** Included studies investing the association of markers of arterial stiffness and CKD incident in the general population

| Study reference             | Sample size  | Study population                             | Country | Mean age | Stiffness index | Modelling of stiffness index | Outcome(s)                                                                                      | Fully adjusted effect estimate(s)                   | Follow-up time | Adjusted confounders                                                                                                                                                                                            |
|-----------------------------|--------------|----------------------------------------------|---------|----------|-----------------|------------------------------|-------------------------------------------------------------------------------------------------|-----------------------------------------------------|----------------|-----------------------------------------------------------------------------------------------------------------------------------------------------------------------------------------------------------------|
| <i>Pulse Wave Velocity</i>  |              |                                              |         |          |                 |                              |                                                                                                 |                                                     |                |                                                                                                                                                                                                                 |
| Madero, 2013 <sup>3</sup>   | 2129         | Population-based Health ABC                  | USA     | 74y      | cfPWV           | Doubling of PWV              | -GFRcys loss of > 3 ml/min per 1.73 m <sup>2</sup><br>-eGFR < 60 ml/min per 1.73 m <sup>2</sup> | OR: 1.16 (0.89,1.52)<br>IRR: 1.39 (1.09,1.77)       | 8.5 years      | Age, sex, race, site, anti HTN medication, DM, smoking, LDL, HDL, HF, baseline GFR                                                                                                                              |
| Upadhyay 2009 <sup>4</sup>  | 1252<br>1675 | Population-based Framingham Study            | USA     | 47y      | cfPWV           | per SD<br>SD PWV= 3.1        | -UACR>17men,<br>>25 women<br>-eGFR < 60 ml/min per 1.73 m <sup>2</sup>                          | OR: 1.14 (0.94, 1.42)<br>OR: 0.94 (0.75, 1.19)      | 7-10 years     | Age, sex, MAP, HR, BMI, DM, fasting glucose, total / HDL cholesterol ratio, triglycerides, CHD, anti-hypertensive and(or) lipid-lowering medication, smoking, hormone replacement therapy, baseline UACR or GFR |
| Tomiyama, 2010 <sup>5</sup> | 2053         | Occupational cohort                          | Japan   | 40y      | baPWV           | 1 m/s                        | -GFRcr loss of > 3 ml/min per 1.73 m <sup>2</sup><br>-eGFR < 60 ml/min per 1.73 m <sup>2</sup>  | OR: 1.15 (1.03, 1.29)<br>OR: 1.36 (1.09, 1.70)      | 5-6 years      | Baseline GFR, age, sex, BMI, alcohol, smoking, BP, HR, CHOL, HDL, TG, glucose, medication, CHD, stroke, HTN, DM, dyslipidaemia                                                                                  |
| <i>Pulse Pressure</i>       |              |                                              |         |          |                 |                              |                                                                                                 |                                                     |                |                                                                                                                                                                                                                 |
| Madero, 2013 <sup>3</sup>   | 2129         | Population-based Health ABC                  | USA     | 74y      | Brachial PP     | 10 mmHg                      | -GFRcys loss of > 3 ml/min per 1.73 m <sup>2</sup><br>-eGFR < 60 ml/min per 1.73 m <sup>2</sup> | OR: 1.10 (1.04,1.16)<br>IRR: 1.06 (1.01,1.11)       | 8.5 years      | Age, sex, race, site, anti HTN medication, DM, smoking, LDL, HDL, HF, baseline GFR                                                                                                                              |
| Upadhyay 2009 <sup>4</sup>  | 1252<br>1675 | Population-based Framingham Study            | USA     | 47y      | Central PP      | per SD<br>SD PP= 14.5 mmHg   | -ACR>17men, >25 women<br>-eGFR < 60 ml/min per 1.73 m <sup>2</sup>                              | OR: 1.33 (0.92, 1.93)<br>OR: 1.08 (0.71, 1.64)      | 7-10 years     | Age, sex, MAP, HR, BMI, DM, fasting glucose, total / HDL cholesterol ratio, triglycerides, CHD, anti-hypertensive and(or) lipid-lowering medication, smoking, hormone replacement therapy, baseline UACR or GFR |
| Rifkin, 2013 <sup>6</sup>   | 4365         | Population-based Cardiovascular Health Study | USA     | 72y      | Brachial PP     | 10 mmHg                      | -GFRcys loss of > 3 ml/min per 1.73 m <sup>2</sup><br>-delta GFR                                | OR: 1.15 (1.11, 1.20)<br>Beta: -0.15 (-0.21, -0.09) | 5-6 years      | Baseline GFR, age, sex, BMI, alcohol, smoking, BP, HR, CHOL, HDL, TG, glucose, medication, CHD, stroke, HTN, DM, dyslipidaemia                                                                                  |
| Peralta, 2012 <sup>7</sup>  | 4853         | Population-based MESA                        | USA     | 60y      | Brachial PP     | per SD<br>SD PP= 16mmHg      | Decline in GFR                                                                                  | Beta: 0.35 (-0.43, -0.28)                           | 4.76 years     | Age, sex, race, education, BMI, DM, smoking, anti HTN medication, LDL, HDL, CRP, UACR, SBP                                                                                                                      |

Abbreviations: SD standard deviation, PP pulse pressure, cfPWV carotid-femoral pulse wave velocity, baPWV brachial-ankle pulse wave velocity, eGFR estimated glomerular filtration rate, OR odds ratio, IRR incident rate ratio, HTN hypertension, DM diabetes mellitus, LDL low density lipoprotein, HDL high density lipoprotein, HF heart failure, MAP mean arterial pressure, HR heart rate, CHD coronary heart disease, UACR, urine albumin creatinine ratio, BP blood pressure, TG triglyceride, SBP systolic blood pressure

**Table S3.** Interaction between pulse wave velocity and blood pressure in relation to GFR decline and CKD incidence

|                            |                          | <b>GFR decline</b>       | <b>Incident CKD</b>      |
|----------------------------|--------------------------|--------------------------|--------------------------|
|                            |                          | <b>P for interaction</b> | <b>P for interaction</b> |
| <b>Pulse wave velocity</b> | Systolic blood pressure  | 0.13                     | 0.54                     |
|                            | Diastolic blood pressure | 0.58                     | 0.60                     |

Analyses are adjusted for age, sex, mean arterial pressure, heart rate, eGFR baseline, pulse pressure/pulse wave velocity, and follow up time (for analyses on incidence of CKD).

**Table S4.** Association of genetic risk scores for measures of arterial stiffness with annual decline in eGFR and incidence of CKD adjusted for pulse pressure and pulse wave velocity measures.

|                                | eGFR decline |             |         | Incident CKD |            |         |
|--------------------------------|--------------|-------------|---------|--------------|------------|---------|
|                                | Difference   | 95%CI       | P-value | RR           | 95%CI      | P-value |
| <b>Pulse pressure GRS</b>      |              |             |         |              |            |         |
| Model 1                        | 0.05         | 0.01, 0.10  | 0.02    | 1.08         | 1.02,1.13  | <0.01   |
| Model 2                        | 0.05         | 0.01, 0.10  | 0.04    | 1.07         | 1.02, 1.13 | <0.01   |
| <b>Pulse wave velocity GRS</b> |              |             |         |              |            |         |
| Model 1                        | 0.004        | -0.01, 0.05 | 0.85    | 1.01         | 0.96, 1.07 | 0.52    |
| Model 2                        | 0.008        | -0.04, 0.05 | 0.73    | 1.02         | 0.97, 1.07 | 0.45    |

Abbreviations: CI 95% Confidence interval; GRS Genetic risk score; RR Relative risk

Differences (beta) are per standard deviation of pulse pressure GRS and pulse wave velocity GRS.

Model 1: Adjusted for age, sex, mean arterial pressure, heart rate, eGFR baseline, pulse pressure/pulse wave velocity, and follow up time (for analyses on incidence of CKD).

Model 2: Additionally adjusted for body mass index, alcohol consumption, smoking, high-density lipoprotein cholesterol, total cholesterol, diuretics, ACE inhibitors, beta blockers, calcium channel blockers, and history of diabetes and coronary heart disease.

**Table S5.** Association of the pulse pressure genes with systolic and diastolic blood pressure

| SNP name   | Closest gene         | Coded Allele | Systolic blood pressure |                | Diastolic blood pressure |                |
|------------|----------------------|--------------|-------------------------|----------------|--------------------------|----------------|
|            |                      |              | <i>Difference</i>       | <i>P value</i> | <i>Difference</i>        | <i>P value</i> |
| rs13002573 | <i>FIGN</i>          | G            | 0.653                   | 0.117          | -0.061                   | 0.781          |
| rs871606   | <i>CHIC2</i>         | T            | 0.051                   | 0.930          | -0.345                   | 0.252          |
| rs17477177 | <i>PIK3CG</i>        | T            | -1.303                  | <b>0.003</b>   | 0.087                    | 0.709          |
| rs2071518  | <i>NOV</i>           | T            | -0.087                  | 0.831          | 0.213                    | 0.315          |
| rs11222084 | <i>ADAMTS-8</i>      | T            | -0.329                  | 0.379          | 0.461                    | 0.018          |
| rs1173756  | <i>NPR3</i>          | T            | 0.074                   | 0.832          | 0.209                    | 0.253          |
| rs9663362  | <i>PLCE-1</i>        | G            | 1.031                   | <b>0.003</b>   | 0.368                    | 0.046          |
| rs3824755  | <i>CYP17A1-NT5C3</i> | G            | 0.721                   | 0.246          | 0.156                    | 0.633          |
| rs17249754 | <i>ATP2B1</i>        | G            | 0.742                   | 0.125          | 0.252                    | 0.319          |
| rs17608766 | <i>GOSR2</i>         | T            | 0.610                   | 0.226          | 0.186                    | 0.480          |

To account for multiple testing, we used Bonferroni corrected P-value ( $0.05/\text{number of SNPs} \times 2 (10 \times 2) = 0.002$ ).

**Table S6.** Association of pulse pressure genetic risk score excluding *PIK3CG* and *PLCE-1* gene with annual decline in eGFR and incidence of CKD.

|                           | eGFR decline |                             |         | Incident CKD |            |         |
|---------------------------|--------------|-----------------------------|---------|--------------|------------|---------|
|                           | Difference   | 95%CI                       | P-value | RR           | 95%CI      | P-value |
| <b>Pulse pressure GRS</b> |              |                             |         |              |            |         |
| Model 1                   | 0.06         | 0.01, 0.11                  | 0.01    | 1.08         | 1.03,1.14  | <0.01   |
| Model 2                   | 0.06         | $7.9 \times 10^{-3}$ , 0.11 | 0.01    | 1.08         | 1.02, 1.14 | <0.01   |

Abbreviations: CI Confidence interval, GRS Genetic risk score, RR Relative risk

Differences (beta) are per standard deviation.

Model 1: Adjusted for age, sex, mean arterial pressure, heart rate, eGFR baseline and follow up time (for analyses on incidence of CKD).

Model 2: Additionally adjusted for diuretics, ACE inhibitors, beta blockers, calcium channel blockers, body mass index, alcohol consumption, smoking, high density lipoprotein cholesterol, total cholesterol, history of diabetes and coronary heart disease, and follow up time (for analyses on incidence of CKD).

**Figure S1.** Flow diagram of studies through the different phases of the meta-analyses

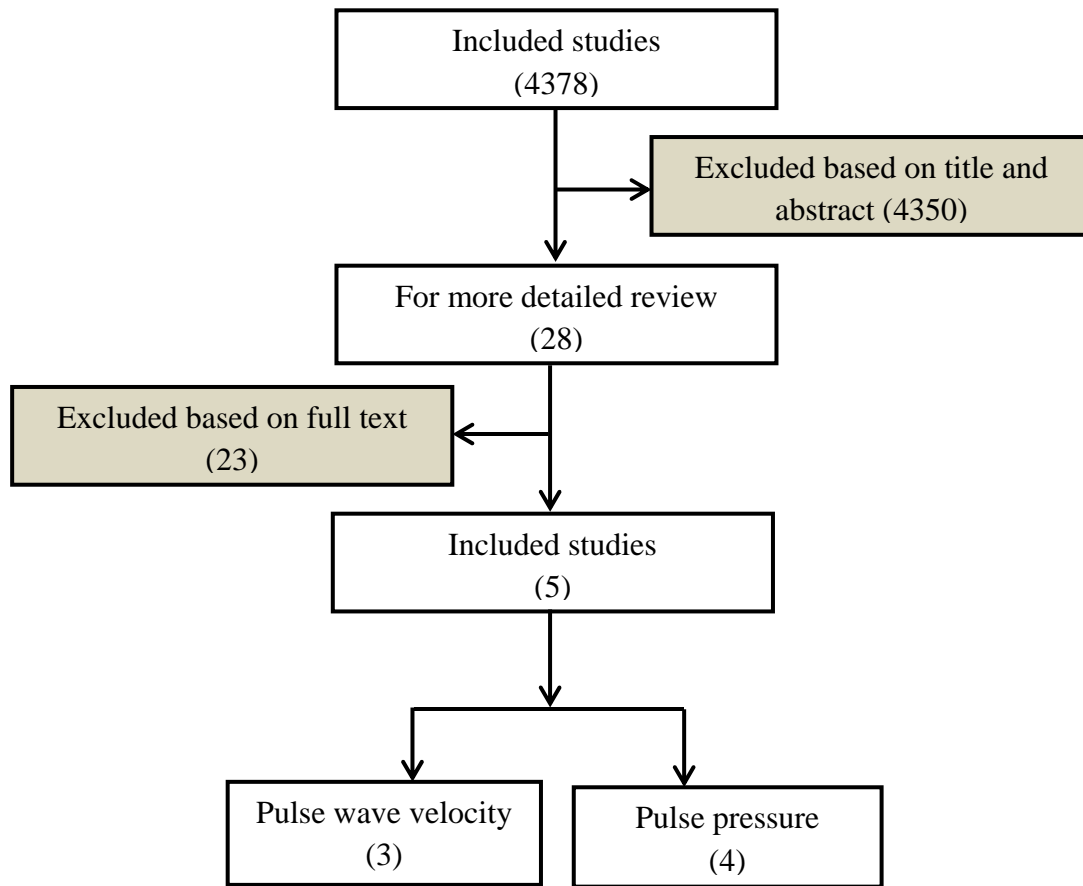

**Figure S2. (A)** Forest plot of multivariate adjusted relative risk for the association of pulse pressure with new onset CKD excluding the study with outcome definition of GFR loss of  $> 3$  ml/min/1.73 m<sup>2</sup>

**(B)** Forest plot of multivariate adjusted relative risk for the association of pulse wave velocity with new onset CKD excluding the study with ankle brachial pulse wave velocity.

A)

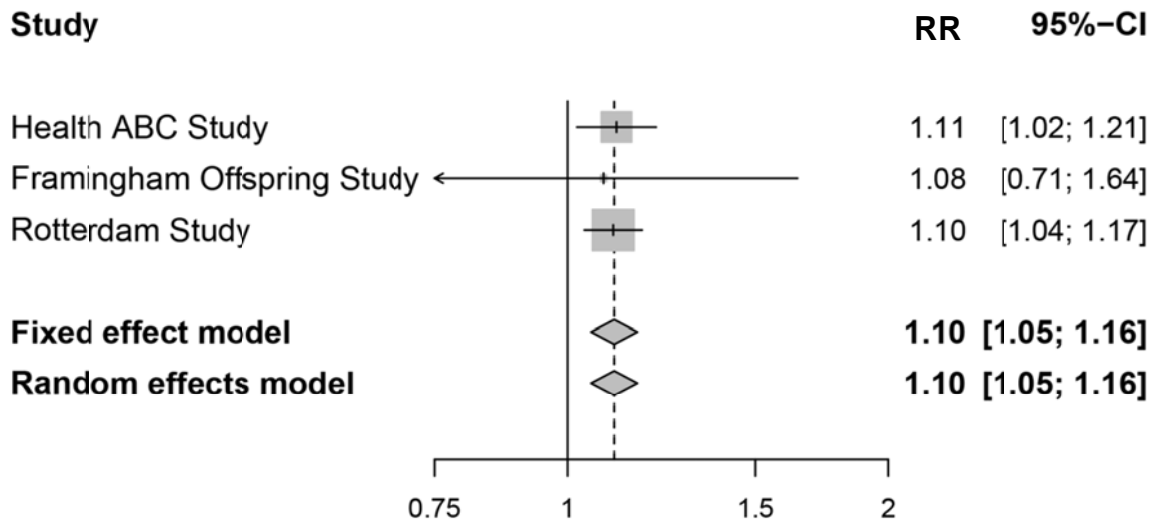

B)

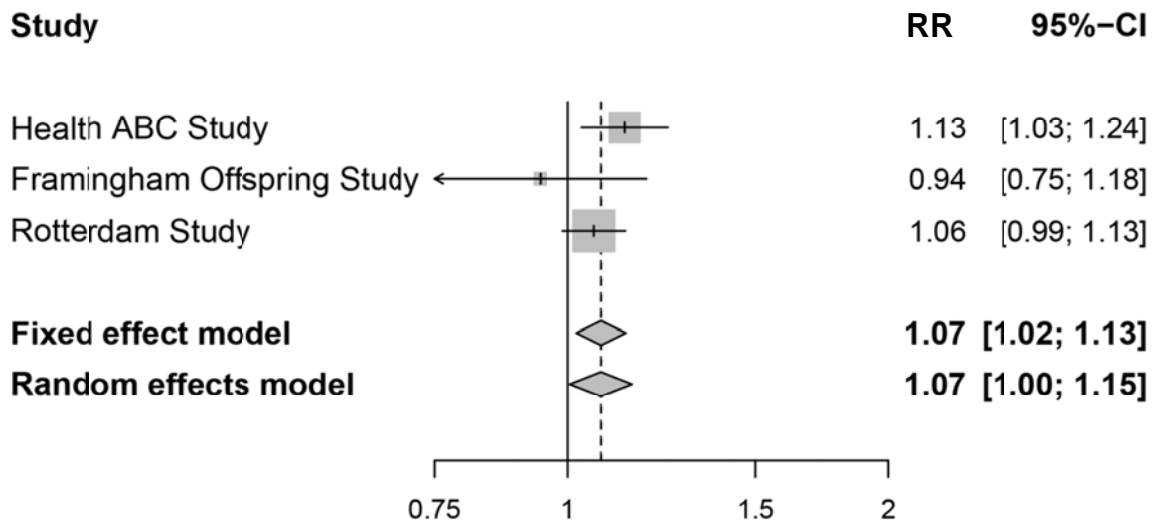



**Appendix.** Search terms for the association between markers of arterial stiffness and incidence kidney disease in the population-based study.

*Embase.com*

('arterial stiffness'/de OR 'pulse pressure'/de OR 'arterial pressure'/de OR 'blood vessel compliance'/exp OR 'blood vessel calcification'/exp OR 'augmentation index'/de OR 'Young modulus'/de OR 'pulse wave'/de OR 'pulsatile flow'/de OR (((aort\* OR arter\* OR vascul\* OR vessel\*) NEAR/6 (stiff\* OR complian\* OR calcif\*)) OR (wave NEXT/1 (velocit\* OR reflection\*)) OR ('internal carotid' NEAR/3 index) OR (pulse NEAR/3 (pressure\* OR tension\*)) OR distensibil\* OR augmentation OR 'stiffness index' OR ((capacit\* OR oscillat\*) NEAR/3 complian\*) OR ((elastic\* OR young) NEXT/1 modul\*) OR PWV OR CPP OR 'pulsatile flow'):ab,ti) AND (kidney/exp OR 'kidney function'/exp OR 'kidney function test'/exp OR 'kidney disease'/de OR 'chronic kidney disease'/exp OR 'chronic kidney failure'/exp OR microalbuminuria/exp OR ('albumin'/exp AND 'creatinine'/exp) OR 'cystatin C'/exp OR (kidney\* OR renal OR nephro\* OR glomeru\* OR ckd OR microalbuminuri\* OR (micro NEXT/1 albuminuri\*) OR (albumin\* NEAR/3 creatinin\*) OR 'cystatin C'):ab,ti) AND ('cohort analysis'/exp OR 'longitudinal study'/exp OR 'prospective study'/exp OR 'follow up'/exp OR (population\* OR cohort\* OR longitudinal\* OR prospectiv\* OR 'follow up')) NOT ([animals]/lim NOT [humans]/lim) AND [english]/lim NOT ([Conference Abstract]/lim OR [Letter]/lim OR [Note]/lim OR [Conference Paper]/lim OR [Editorial]/lim)

*Medline (OvidSP)*

("Vascular Stiffness"/ OR exp Elasticity/ OR "Arterial Pressure"/ OR "Vascular Calcification"/ OR "Pulse Wave Analysis"/ OR "pulsatile flow"/ OR (((aort\* OR arter\* OR vascul\* OR vessel\*) ADJ6 (stiff\* OR complian\* OR calcif\*)) OR (wave ADJ (velocit\* OR reflection\*)) OR ("internal carotid" ADJ3 index) OR (pulse ADJ3 (pressure\* OR tension\*)) OR distensibil\* OR augmentation OR "stiffness index" OR ((capacit\* OR oscillat\*) ADJ3 complian\*) OR ((elastic\* OR young) ADJ3 modul\*) OR PWV OR CPP OR "pulsatile flow").ab,ti.) AND (exp kidney/ OR exp Kidney Function Tests/ OR kidney diseases/ OR Renal Insufficiency, Chronic/ OR (albumins/ AND creatinine/) OR cystatin C/ OR (kidney\* OR renal OR nephro\* OR glomeru\* OR ckd OR microalbuminuri\* OR (micro ADJ3 albuminuri\*) OR (albumin\* ADJ3 creatinin\*) OR cystatin C).ab,ti.) AND (exp Cohort Studies/ OR (population\* OR cohort\* OR longitudinal\* OR prospectiv\* OR "follow up")) NOT (exp animals/ NOT humans/) AND english.la. NOT (letter OR news OR comment OR editorial OR congresses OR abstracts).pt.

*Web-of-science*

TS=(((aort\* OR arter\* OR vascul\* OR vessel\*) NEAR/6 (stiff\* OR complian\* OR calcif\*)) OR (wave NEAR/1 (velocit\* OR reflection\*)) OR ("internal carotid" NEAR/3 index) OR (pulse NEAR/3 (pressure\* OR tension\*)) OR distensibil\* OR augmentation OR "stiffness index" OR ((capacit\* OR oscillat\*) NEAR/3 complian\*) OR ((elastic\* OR young) NEAR/1 modul\*) OR PWV OR CPP OR "pulsatile flow")) AND ((kidney\* OR renal OR nephro\* OR glomeru\* OR ckd OR microalbuminuri\* OR (micro NEAR/1 albuminuri\*) OR (albumin\* NEAR/3 creatinin\*) OR "cystatin C")) AND ((population\* OR cohort\* OR longitudinal\* OR prospectiv\* OR "follow up")) ) AND DT=(Article) AND LA=(english)

*PubMed publisher*

("Vascular Stiffness"[mh] OR Elasticity[mh] OR "Arterial Pressure"[mh] OR "Vascular Calcification"[mh] OR "Pulse Wave Analysis"[mh] OR "pulsatile flow"[mh] OR (((aort\*[tiab] OR arter\*[tiab] OR vascul\*[tiab] OR vessel\*[tiab]) AND (stiff\*[tiab] OR complian\*[tiab] OR calcif\*[tiab])) OR (wave ADJ (velocit\*[tiab] OR reflection\*[tiab])) OR ("internal carotid" AND index) OR (pulse AND (pressure\*[tiab] OR tension\*[tiab])) OR distensibil\*[tiab] OR augmentation OR "stiffness index" OR ((capacit\*[tiab] OR oscillat\*[tiab]) AND complian\*[tiab]) OR ((elastic\*[tiab] OR young) ADJ modul\*[tiab]) OR PWV OR CPP OR "pulsatile flow")) AND (kidney[mh] OR Kidney Function Tests[mh] OR kidney diseases[mh] OR Renal Insufficiency, Chronic[mh] OR (albumins[mh] AND creatinine[mh]) OR cystatin C[mh] OR (kidney\*[tiab] OR renal OR nephro\*[tiab] OR glomeru\*[tiab] OR ckd OR microalbuminuri\*[tiab] OR (micro ADJ3 albuminuri\*[tiab]) OR (albumin\*[tiab] AND creatinin\*[tiab]) OR cystatin C)) AND (Cohort Studies[mh] OR (population\*[tiab] OR cohort\*[tiab] OR longitudinal\*[tiab] OR prospectiv\*[tiab] OR "follow up"))) NOT (animals[mh] NOT humans[mh]) AND english[la] AND publisher[sb])

*Google scholar*

"arterial|pulse|aorta|aortic|artery stiffness|pressure|compliance|calcification"|"wave velocity|reflection"|distensibility|augmentation|"pulsatile flow" kidney|renal|glomerular cohort|longitudinal|prospective|"follow up"

## Supplementary references

1. Mitchell GF, Verwoert GC, Tarasov KV, Isaacs A, Smith AV, Yasmin, et al. Common genetic variation in the 3'-BCL11B gene desert is associated with carotid-femoral pulse wave velocity and excess cardiovascular disease risk: the AortaGen Consortium. *Circ Cardiovasc Genet*. 2012 Feb 1;5(1):81-90.
2. Wain LV, Verwoert GC, O'Reilly PF, Shi G, Johnson T, Johnson AD, et al. Genome-wide association study identifies six new loci influencing pulse pressure and mean arterial pressure. *Nat Genet*. 2011 Oct;43(10):1005-11.
3. Madero M, Peralta C, Katz R, Canada R, Fried L, Najjar S, Shlipak M, Simonsick E, Lakatta E, Patel K, Rifkin D, Hawkins M, Newman A, Sarnak M, Health ABCS: Association of arterial rigidity with incident kidney disease and kidney function decline: the Health ABC study. *Clin J Am Soc Nephrol*, 8: 424-433, 2013
4. Upadhyay A, Hwang SJ, Mitchell GF, Vasani RS, Vita JA, Stancu PI, Meigs JB, Larson MG, Levy D, Benjamin EJ, Fox CS: Arterial stiffness in mild-to-moderate CKD. *J Am Soc Nephrol*, 20: 2044-2053, 2009
5. Tomiyama H, Tanaka H, Hashimoto H, Matsumoto C, Odaira M, Yamada J, Yoshida M, Shiina K, Nagata M, Yamashina A: Arterial stiffness and declines in individuals with normal renal function/early chronic kidney disease. *Atherosclerosis*, 212: 345-350, 2010
6. Rifkin DE, Katz R, Chonchol M, Shlipak MG, Sarnak MJ, Fried LF, Newman AB, Siscovick DS, Peralta CA: Blood pressure components and decline in kidney function in community-living older adults: the Cardiovascular Health Study. *Am J Hypertens*, 26: 1037-1044, 2013
7. Peralta CA, Jacobs DR, Jr., Katz R, Ix JH, Madero M, Duprez DA, Sarnak MJ, Criqui MH, Kramer HJ, Palmas W, Herrington D, Shlipak MG: Association of pulse pressure, arterial elasticity, and endothelial function with kidney function decline among adults with estimated GFR >60 mL/min/1.73 m<sup>2</sup>: the Multi-Ethnic Study of Atherosclerosis (MESA). *Am J Kidney Dis*, 59: 41-49, 2012
